# Supplementary material for: Uranyl ion coordination polymers with the dibenzobarrelene-based rac- and (R,R)-trans-9,10-dihydro-9,10-ethanoanthracene-11,12-dicarboxylate ligands
Source: Royal Society of Chemistry journal article supplement (doi:10.1039/d3ce01176c), 2024-01-01
Supplement: d3ce01176c1.pdf [file d3ce01176c1.pdf]

# Uranyl ion coordination polymers with the dibenzobarrelene-based *rac*- and (*R,R*)-*trans*-9,10-dihydro-9,10-ethanoanthracene-11,12- dicarboxylate ligands

Young Hoon Lee,<sup>a</sup> Sotaro Kusumoto,<sup>b</sup> Youssef Atoini,<sup>c</sup> Yoshihiro Koide,<sup>b</sup> Shinya Hayami,<sup>\*d</sup>  
Yang Kim,<sup>\*d</sup> Jack Harrowfield<sup>\*e</sup> and Pierre Thuéry<sup>\*f</sup>

<sup>a</sup> Department of Chemistry, University of Ulsan, Tekeunosaneop-ro 55beon-gil, Nam-gu, Ulsan 44610, Republic of Korea

<sup>b</sup> Department of Material & Life Chemistry, Kanagawa University, 3-27-1 Rokkakubashi, Kanagawa-ku, Yokohama 221-8686, Japan

<sup>c</sup> Technical University of Munich, Campus Straubing, Schulgasse 22, 94315 Straubing, Germany

<sup>d</sup> Department of Chemistry, Graduate School of Science and Technology, Institute of Industrial Nanomaterials (IINa), Kumamoto University, 2-39-1 Kurokami, Chuo-ku, Kumamoto 860-8555, Japan. E-mail: [hayami@kumamoto-u.ac.jp](mailto:hayami@kumamoto-u.ac.jp), [ykim@kumamoto-u.ac.jp](mailto:ykim@kumamoto-u.ac.jp)

<sup>e</sup> Université de Strasbourg, ISIS, 8 allée Gaspard Monge, 67083 Strasbourg, France. E-mail: [harrowfield@unistra.fr](mailto:harrowfield@unistra.fr)

<sup>f</sup> Université Paris-Saclay, CEA, CNRS, NIMBE, 91191 Gif-sur-Yvette, France. E-mail: [pierre.thuery@cea.fr](mailto:pierre.thuery@cea.fr)

## Supporting Information

### Synthesis of the ligands

**Racemic 11*R*\*,12*R*\*-9,10-dihydro-9,10-ethanoanthracene-11,12-dicarboxylic acid (*rac*-**deadcH<sub>2</sub>**).**<sup>1</sup> A mixture of anthracene (12.48 g, 70.0 mmol) and fumaric acid (2.71 g, 23.3 mmol) in dry 1,4-dioxane (100 mL) was refluxed for 72 h under a nitrogen atmosphere. After cooling the reaction mixture down to ambient temperature, the solvent was evaporated off under reduced pressure. Saturated aqueous NaHCO<sub>3</sub> solution (50 mL) was added to the residue and the mixture stirred overnight. Unreacted anthracene was removed by extraction with ethyl acetate, the aqueous phase then acidified with 2.0 M HCl (to pH = 1) and the white solid deposited was filtered off, washed with water and dried at 70 °C (6.4 g, 93%). (Note that this procedure is derived from the supplementary information of ref. 1).

**(11*R*,12*R*)-(+)-9,10-Dihydro-9,10-ethanoanthracene-11,12-dicarboxylic acid (*R,R*-**deadcH<sub>2</sub>**) and its enantiomer (*S,S*-**deadcH<sub>2</sub>**).**<sup>2</sup> 11*R*\*,12*R*\*-9,10-dihydro-9,10-ethanoanthracene-11,12-dicarboxylic acid (6.4 g, 21.75 mmol) and *L*-proline (2.6 g, 22.58 mmol) were dissolved in methanol (70 mL) at 50 °C and stirred for 4 h at ambient temperature. The reaction mixture was left to cool overnight,

giving a precipitate of needle-like crystals, which were collected by filtration, and the filtrate was stored separately for use in the subsequent step. The first-deposited crystals were washed with cold methanol and recrystallized 3 times from hot methanol to give pure diastereomer, which was added to a mixture of water (50 mL) and diethyl ether (50 mL). The mixture was stirred for 2 h at ambient temperature, the phases separated and the aqueous layer further extracted with diethyl ether (30 mL  $\times$  3). The combined ethereal layer was washed with brine (20 mL) before drying over MgSO<sub>4</sub>. The solvent was evaporated under reduced pressure and the residue dried under vacuum to give optically pure (11*S*,12*S*)-(–)-9,10-dihydro-9,10-ethanoanthracene-11,12-dicarboxylic acid as a white powder (1.4 g, 22%). The filtrate stored in the previous step was slowly evaporated at ambient temperature to produce block-like crystals, which were filtered off and washed with cold methanol before their dissolution in a mixture of water (50 mL) and diethyl ether (50 mL). The mixture was stirred for 2 hours, the phases separated and the aqueous layer further extracted with diethyl ether (30 mL  $\times$  3). The combined ethereal extracts were washed with brine (20 mL) then dried over MgSO<sub>4</sub>. The solvent was evaporated under reduced pressure and the residue dried under vacuum to give (11*R*,12*R*)-(+)-9,10-dihydro-9,10-ethanoanthracene-11,12-dicarboxylic acid (1.7 g, 27%).

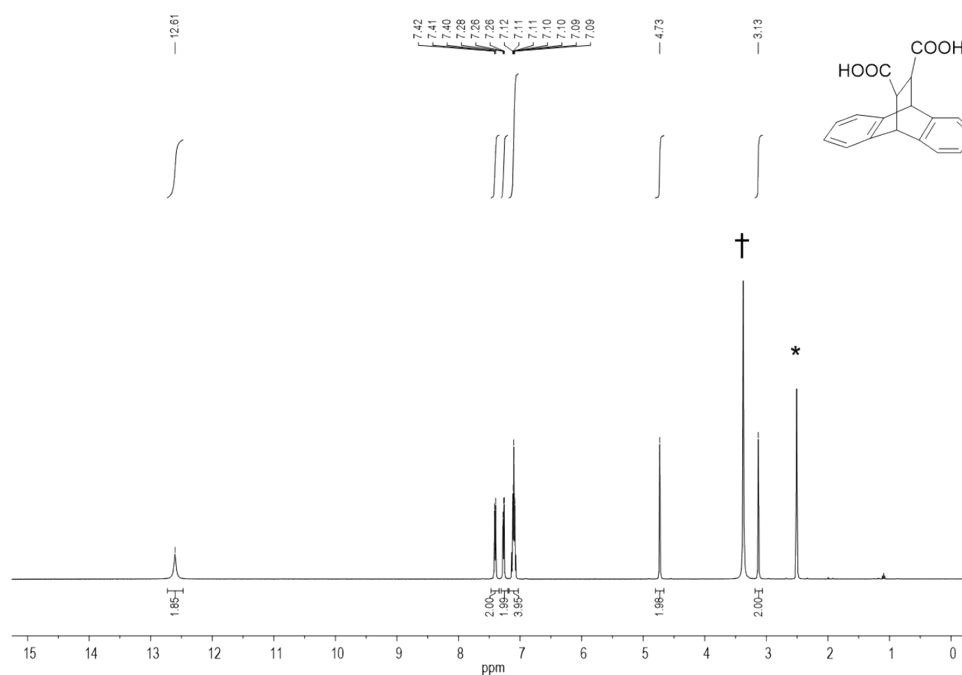

**Fig. S1** <sup>1</sup>H NMR spectrum of 9,10-dihydro-9,10-ethanoanthracene-11,12-dicarboxylic acid in DMSO-d<sub>6</sub> (\* from CD<sub>3</sub>SOCD<sub>2</sub>H and † from water).

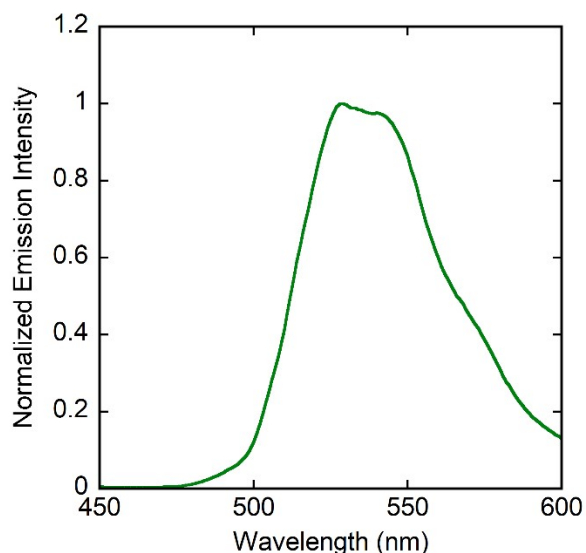

**Fig. S2** Emission spectrum of complex **3** in the crystalline state upon excitation at 420 nm.

**Table S1** Selected dihedral angles in the dicarboxylate motif ( $^{\circ}$ ) and intercarboxylic/ate C $\cdots$ C separation ( $\text{\AA}$ ) in complexes **1–8** and in various deadCH $_n$  species.

|                                     | C–C–C–C  | H–C–C–H     | (O <sub>2</sub> )C–C–C–C(O <sub>2</sub> ) | O <sub>2</sub> C $\cdots$ CO <sub>2</sub> |
|-------------------------------------|----------|-------------|-------------------------------------------|-------------------------------------------|
| <b>1</b>                            | 4.4      | 133.4       | 99.8                                      | 3.445(6)                                  |
| <b>2</b>                            | 2.5      | 134.2/126.5 | 100.9/117.6                               | 3.468(3)/ 3.713(4)                        |
| <b>3</b>                            | 4.0/7.1  | 134.4/134.9 | 99.2/100.0                                | 3.46(2)                                   |
| <b>4</b>                            | 7.0      | 128.8/131.9 | 110.8/105.9                               | 3.673(7)/3.468(7)                         |
| <b>5</b>                            | 3.6      | 132.9       | 101.1                                     | 3.456(9)                                  |
| <b>6</b>                            | 5.5      | 137.7       | 127.0                                     | 3.694(3)                                  |
| <b>7</b>                            | 3.2/5.9  | 120.3/129.6 | 120.8/111.2                               | 3.672(5)/3.575(7)                         |
| <b>8</b>                            | 9.0/6.2  | 137.7/132.3 | 97.8/109.0                                | 3.478(3)/3.618(4)                         |
| Model Chem3D                        | 3.3      | 129.4       | 106.2                                     | 3.523                                     |
| Complexes from the CSD <sup>a</sup> | 0.1–13.7 | 117.8–144.2 | 88.3–117.8                                | 3.340–3.623                               |

<sup>a</sup> Cambridge Structural Database, ver. 5.44. CCDC numbers 908951, 908955, 1168948, 1887850, 1880177, 1253506–1253508, 1261319, 2077286, 2150101–2150279, and 2210049–2211198.

## References

1. A. B. Naidu, E. A. Jaseer and G. Sekar, *J. Org. Chem.*, 2009, **74**, 3675.
2. C. R. Ramanathan and M. Periasamy, *Tetrahedron Asymmetry*, 1998, **9**, 2651.
